# Supplementary material for: Neutrophils enhance early Trypanosoma brucei infection onset
Source: PubMed Central journal article supplement (PMC6060092; doi:10.1038/s41598-018-29527-y), 2018-07-25

## Supplemental Information

### Title

Neutrophils enhance early *Trypanosoma brucei* infection onset

### Authors and affiliations

***Guy Caljon*<sup>2\*</sup>, *Dorien Mabile*<sup>2</sup>, *Benoît Stijlemans*<sup>3,4</sup>, *Carl De Trez*<sup>4</sup>, *Massimiliano Mazzone*<sup>6,7</sup>, *Fabienne Tacchini-Cottier*<sup>8</sup>, *Marie Malissen*<sup>9</sup>, *Jo A. Van Ginderachter*<sup>3,4</sup>, *Stefan Magez*<sup>4,5</sup>, *Patrick De Baetselier*<sup>3,4</sup> and *Jan Van Den Abbeele*<sup>1\*</sup>.**

<sup>1</sup>Unit of Veterinary Protozoology, Department of Biomedical Sciences, Institute of Tropical Medicine Antwerp (ITM), Antwerp, Belgium. <sup>2</sup>Laboratory for Microbiology, Parasitology and Hygiene (LMPH), University of Antwerp, Wilrijk, Belgium. <sup>3</sup>Myeloid Cell Immunology Lab, VIB-UGent Center for Inflammation Research, Ghent, Belgium. <sup>4</sup>Unit of Cellular and Molecular Immunology, Vrije Universiteit Brussel (VUB), Brussels, Belgium. <sup>5</sup> Ghent University Global Campus, Incheon, South Korea. <sup>6</sup>Laboratory of Tumor Inflammation and Angiogenesis, Center for Cancer Biology, VIB, Leuven, Belgium; <sup>7</sup>Laboratory of Tumor Inflammation and Angiogenesis, Center for Cancer Biology, Department of Oncology, KU Leuven, Leuven, Belgium <sup>8</sup> Department of Biochemistry, WHO-Immunology Research and Training Center, University of Lausanne, Switzerland, <sup>9</sup> Centre d'Immunologie de Marseille-Luminy, Aix Marseille Université UM2, Inserm U1104, CNRS UMR7280, F-13288, Marseille, France.

## Supplemental table

**Table S1: List of primers used for the dermal transcriptional analyses.** Indicated in the table are the sequences and amplicon sizes of primers designed or retrieved from an online repository (RTprimerDB; indicated with \*).

| Gene          | Description                                | Name primer     | Sequence primer           | # nucleotides | Amplicon size (bp) |
|---------------|--------------------------------------------|-----------------|---------------------------|---------------|--------------------|
| IL-1b         | Interleukin 1 beta                         | Forward primer* | CAACCAACAAGTGATATTCTCCATG | 25            | 152                |
|               |                                            | Reverse primer* | GATCCACACTCTCCAGCTGCA     | 21            |                    |
| IL-6          | Interleukin 6                              | Forward primer* | CTGCAAGAGACTTCCATCCAGTT   | 23            | 70                 |
|               |                                            | Reverse primer* | GAAGTAGGGGAAAGCCGTGG      | 19            |                    |
| TNF- $\alpha$ | Tumor necrosis factor alpha                | Forward primer* | CCAGTGTGGGAAGCTGTCTT      | 20            | 101                |
|               |                                            | Reverse primer* | AAGCAAAGAGGAGGCAACA       | 20            |                    |
| TUBA1A        | Tubulin, alpha 1A                          | Forward primer* | AAGGAGGATGCTGCCAATAA      | 20            | 135                |
|               |                                            | Reverse primer* | GCTGTGAAAACCAAGAAGC       | 20            |                    |
| IL-10         | Interleukin 10                             | Forward primer* | TTTGAATCCCTGGGTGAGAA      | 21            | 68                 |
|               |                                            | Reverse primer* | GGAGAAATCGATGACAGCGC      | 20            |                    |
| EEF2          | Eukaryotic translation elongation factor 2 | Forward primer  | CTGTGCTGTCCAAGTCCC        | 20            | 149                |
|               |                                            | Reverse primer  | TACTTTTCGGCCAGGTAGCG      | 20            |                    |
| KC (CXCL1)    | Keratinocyte chemoattractant               | Forward primer  | CCACACTCAAGAATGGTCGC      | 20            | 98                 |
|               |                                            | Reverse primer  | CCGTTACTGGGGACACCTT       | 20            |                    |
| LIX (CXCL5)   | Lipopolysaccharide induced CXC chemokine   | Forward primer  | CACTCGCAGTGGAAAGAACG      | 20            | 100                |
|               |                                            | Reverse primer  | CGTGGGTGGAGAGAATCAGC      | 20            |                    |

## Supplemental figures

**Figure S1: Gating strategy for dermal neutrophils and monocytes.** Flow cytometry-based identification of dermal neutrophils ( $CD45^+CD11b^+Ly6C^{Int}Ly6G^+$ ) and monocytes ( $CD45^+CD11b^+Ly6G^-Ly6C^{Hi}$ ) in the dermis of wildtype C57Bl/6 mice naturally infected with *T.b.b.* AnTat1.1E<sup>dsRed</sup>.

**Figure S2: Influence of parasite dose on innate immune cell recruitment to the dermal trypanosome infection site.** Recruitment of (A) neutrophils ( $CD45^+CD11b^+Ly6C^{Int}Ly6G^+$ ) and (B) monocytes ( $CD45^+CD11b^+Ly6G^-Ly6C^{Hi}$ ) to the ear dermis within 4.5 hours after the bites of *T.b.b.* AnTAR1 (high parasite inoculum) or *T.b.b.* AnTat1.1E<sup>dsRed</sup> salivary gland infected (SG+) tsetse flies (low parasite inoculum). Mice not exposed to tsetse fly bites are included as controls.

**Figure S3: *In vivo* trypanosome phagocytosis in murine blood.** Flow cytometry analysis of (A) *T.b.b.* AnTat1.1E<sup>dsRed</sup> and (B) AnTat1.1E<sup>TagGFP2</sup> uptake by white blood cells ( $CD45^+$  cells) revealing no significant levels of phagocytosis in blood of infected mice.

**Figure S4: *In vitro* trypanosome phagocytosis in murine blood.** (A) Confocal microphotographs and merged image of AnTat1.1E<sup>TagGFP2</sup> *T.b.b.* stained with the lysosome-stable pHrodo Red (B) Flow cytometry analysis to detect phagocytosis of pHrodo Red-stained AnTat1.1E<sup>TagGFP2</sup> *T.b.b.* parasites by white blood cells ( $CD45^+$  cells) in the two fluorescent channels (pHrodo Red and GFP).

**Figure S5: Antibody mediated neutrophil depletion in LysM-GFP mice.** Flow cytometry analysis detecting the presence of neutrophils ( $Ly6C^{Int}LysM-GFP^{Hi}$ ) and monocytes ( $Ly6C^{Hi}LysM-GFP^{Int}$ ) in peripheral blood of LysM-GFP mice treated with neutrophil depleting antibody RB6-8C5 (A) or 1A8 (B) compared to the appropriated isotype controls (LTF-2 or 2A3).

**Figure S6: Plasma cytokine levels following a natural trypanosome transmission.** (A) Plasma cytokine levels in mice exposed to naive tsetse flies and in mice at various time points during the early infection onset after a tsetse mediated *T.b.b.* AnTAR1 inoculation. (Control  $n = 7$ ; naive bite exposed  $n = 6$ ; infective bite exposed  $n = 5$ ) (B) Plasma cytokine concentrations in naturally 6 day infected *Genista* heterozygous (controls,  $n = 7$ ) and homozygous (neutropenic,  $n = 3$ ) mice and in 1A8 treated (neutrophil depleted,  $n = 6$ ) or 2A3 treated (isotype control,  $n = 6$ ) C57Bl/6 TNF<sup>-/-</sup> mice. Cytokine concentrations are the means  $\pm$  SEM. Statistical significance levels based on the Mann-Whitney test are indicated.

**Video S1: Intradermal evaluation of parasite phagocytosis in freshly prepared dermal tissue.** Video obtained by confocal imaging (representing approximately 8 minutes of recording) of freshly separated ear dermal sheets of LysM-GFP mice at 90 hpi following the bites of *T.b.b.* AnTat1.1E<sup>dsRed</sup> infected tsetse flies. Ear tissues were counterstained by mounting in Hoechst 33342.

**Video S2: Intradermal evaluation of parasite phagocytosis in conditions of reduced parasite motility.** Video obtained by confocal imaging (representing approximately 8 minutes of recording) of separated ear dermal sheets of LysM-GFP mice (harboring  $LysM-GFP^{Hi}$  neutrophils and  $LysM-GFP^{Int}$  myeloid mononuclear cells) at 90 hpi following the bites of *T.b.b.* AnTat1.1E<sup>dsRed</sup> infected tsetse flies. Ear tissues were counterstained by mounting in Hoechst 33342. Prolonged evaluation of the tissue resulted in reduced motility of the trypanosomes, while myeloid cell patrolling behavior continued and with obvious phagocytic activity towards the dermal trypanosomes.

Figure S1

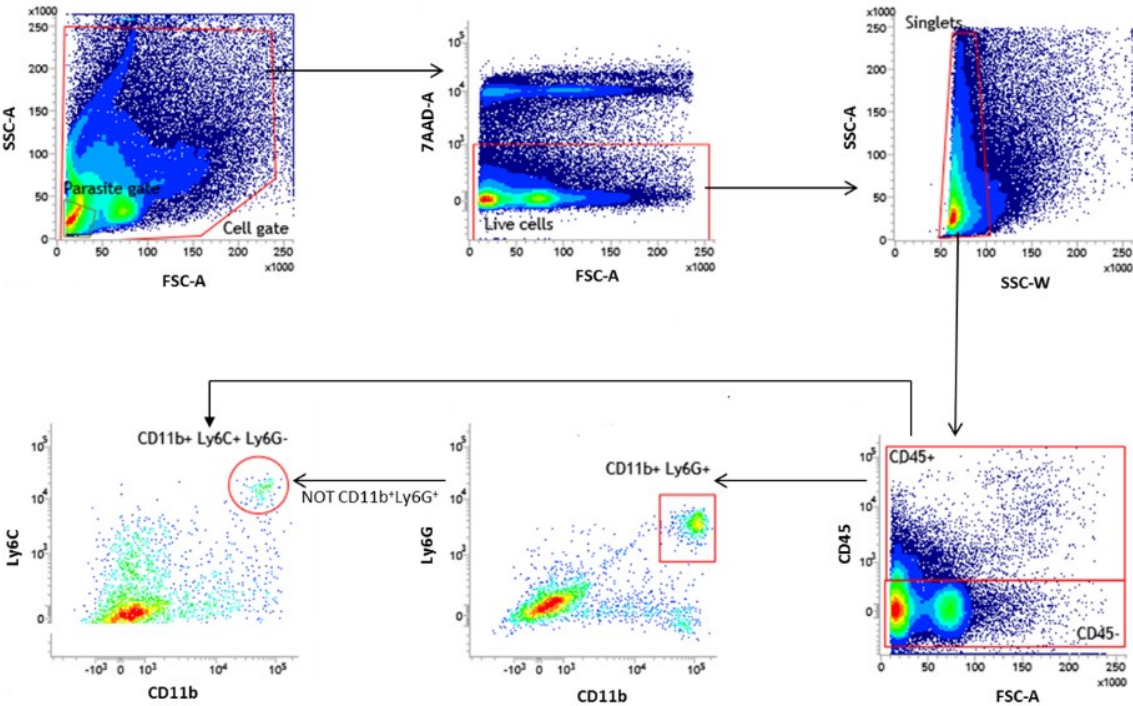

Figure S2

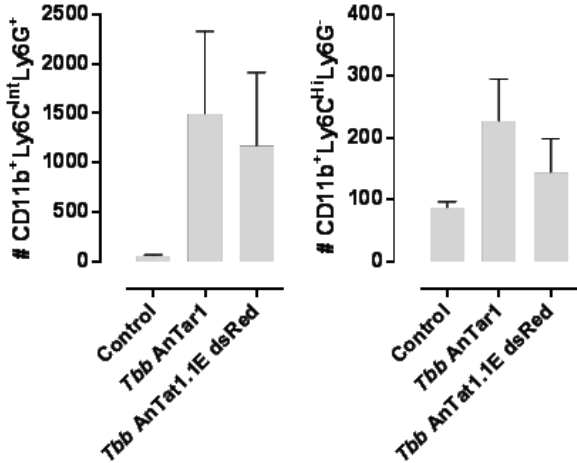

Figure S3

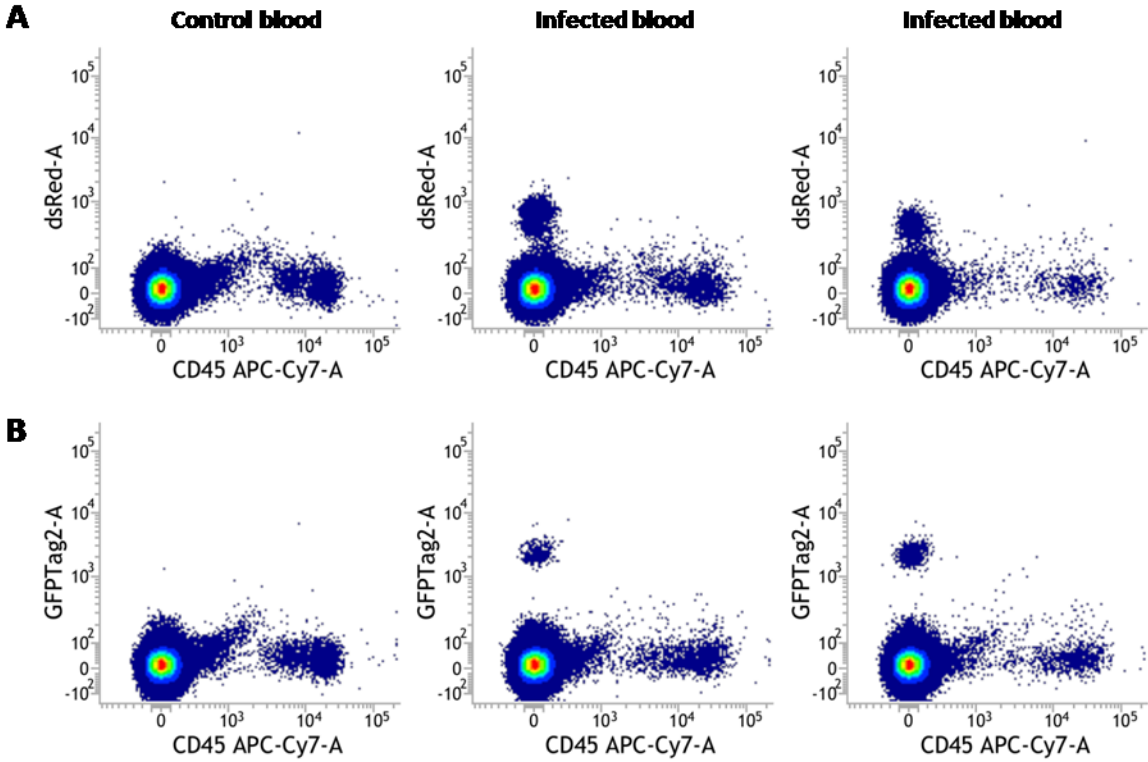

Figure S4

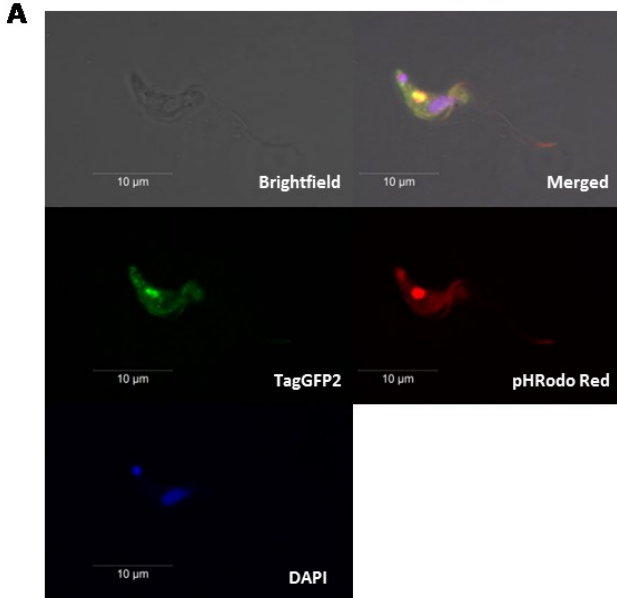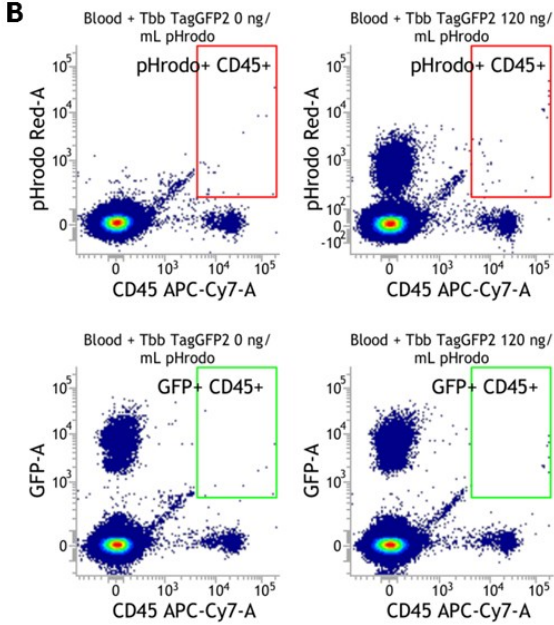

Figure S5

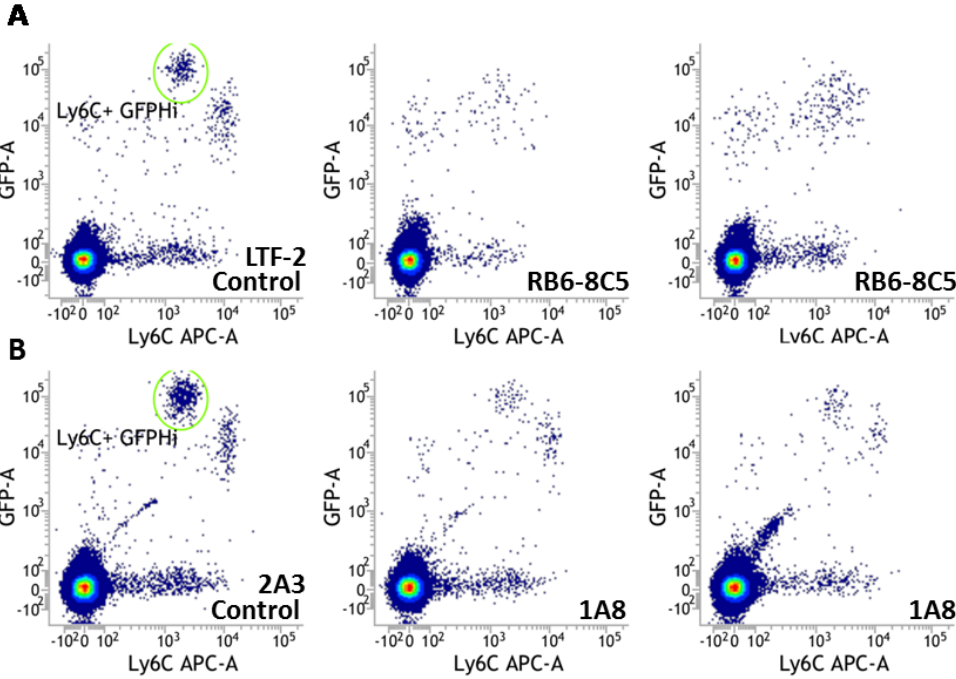



Figure S6

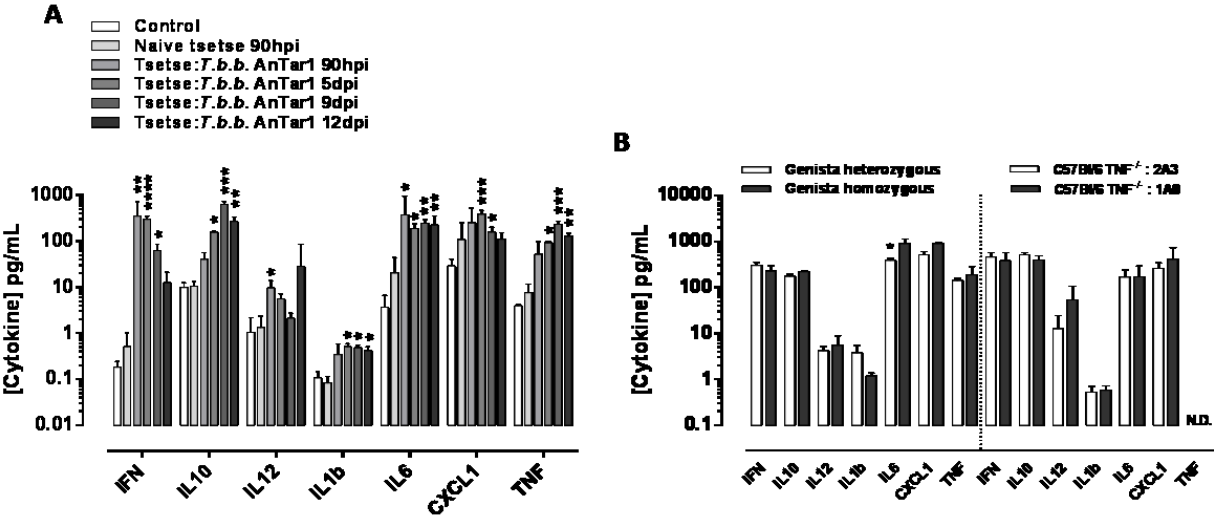

Supplement: 41598_2018_29527_MOESM3_ESM.pdf [file 41598_2018_29527_MOESM3_ESM.pdf]
